# Supplementary material for: Influence of ion exchange conditions on the defect chemistry and performance of cobalt doped layered lithium manganese oxide based intercalation compounds
Source: Royal Society of Chemistry journal article supplement (doi:10.1039/b002552f), 2000-01-01
Supplement: b002552f.doc [file b002552f.doc]

Powder neutron diffraction profile for the nominal composition Li*x*(Mn0.975Co0.025)O2. Dots represent the observed data, solid line represents the best fit, and the lower curve corresponds to the difference between the observed and calculated profiles. Vertical lines indicate the positions of reflections. Peak marked with * arises from the V container.
